# Supplementary material for: Nutrient Intake Adequacy from Food and Beverage Intake of US Children Aged 1–6 Years from NHANES 2001–2016
Source: PubMed Central journal article supplement (PMC8002201; doi:10.3390/nu13030827), 2021-03-03
Supplement: nutrients-13-00827-s001.pdf [file nutrients-13-00827-s001.pdf]

**Table S1. Mean nutrient intake of children 1-6 and proportion not meeting DRIs by Age Group (NHANES 2001-2016)**

| Nutrient            | 1-2 y                    |                      |                     | 2-3 y                    |                      |                     | 1-3 y                    |                         |                         | 4-6 y                    |                         |                          |
|---------------------|--------------------------|----------------------|---------------------|--------------------------|----------------------|---------------------|--------------------------|-------------------------|-------------------------|--------------------------|-------------------------|--------------------------|
|                     | Mean ± S.E. <sup>1</sup> | % < EAR <sup>2</sup> | % > AI <sup>2</sup> | Mean ± S.E. <sup>1</sup> | % < EAR <sup>2</sup> | % > AI <sup>2</sup> | Mean ± S.E. <sup>1</sup> | % < EAR <sup>2</sup>    | % > AI <sup>2</sup>     | Mean ± S.E. <sup>1</sup> | % < EAR <sup>2</sup>    | % > AI <sup>2</sup>      |
| Dietary Fiber (g)   | 9.5 ± 0.1                |                      | 0.6 ± 0.1           | 10.6 ± 0.1               |                      | 1.4 ± 0.3           | 9.9 ± 0.1                |                         | 1.0 ± 0.2 <sup>a</sup>  | 12.1 ± 0.1               |                         | 0.2 ± 0.1 <sup>b</sup>   |
| Vitamin A, RAE (µg) | 558.7 ± 8.9              | 0.5 ± 0.1            |                     | 548.7 ± 8.1              | 0.5 ± 0.2            |                     | 552.0 ± 7.1              | 0.5 ± 0.1 <sup>a</sup>  |                         | 576.0 ± 8.5              | 2.1 ± 0.4 <sup>b</sup>  |                          |
| Thiamin (mg)        | 1.1 ± 0.0                | 0.0 ± 0.0            |                     | 1.2 ± 0.0                | 0.0 ± 0.0            |                     | 1.2 ± 0.0                | 0.0 ± 0.0               |                         | 1.4 ± 0.0                | 0.0 ± 0.0               |                          |
| Riboflavin (mg)     | 1.9 ± 0.0                | 0.0 ± 0.0            |                     | 1.8 ± 0.0                | 0.0 ± 0.0            |                     | 1.9 ± 0.0                | 0.0 ± 0.0               |                         | 1.9 ± 0.0                | 0.0 ± 0.0               |                          |
| Niacin (mg)         | 12.9 ± 0.1               | 0.3 ± 0.1            |                     | 14.5 ± 0.2               | 0.5 ± 0.0            |                     | 13.7 ± 0.1               | 0.2 ± 0.1               |                         | 17.7 ± 0.2               | 0.0 ± 0.0               |                          |
| Vitamin B6 (mg)     | 1.3 ± 0.0                | 0.0 ± 0.0            |                     | 1.35 ± 0.0               | 0.0 ± 0.0            |                     | 1.3 ± 0.0                | 0.0 ± 0.0               |                         | 1.5 ± 0.0                | 0.0 ± 0.0               |                          |
| Folate DFE (µg)     | 355.5 ± 4.8              | 0.1 ± 0.1            |                     | 402.7 ± 6.0              | 0.0 ± 0.0            |                     | 376.9 ± 4.6              | 0.1 ± 0.0               |                         | 481.3 ± 6.2              | 0.1 ± 0.0               |                          |
| Vitamin B12 (µg)    | 4.3 ± 0.1                | 0.0 ± 0.0            |                     | 4.3 ± 0.1                | 0.0 ± 0.0            |                     | 4.3 ± 0.1                | 0.0 ± 0.0               |                         | 4.5 ± 0.1                | 0.0 ± 0.0               |                          |
| Vitamin C (mg)      | 87.2 ± 2.2               | 0.3 ± 0.1            |                     | 89.2 ± 2.0               | 0.3 ± 0.1            |                     | 87.4 ± 1.7               | 0.3 ± 0.1 <sup>a</sup>  |                         | 82.4 ± 1.9               | 2.3 ± 0.4 <sup>b</sup>  |                          |
| Vitamin D (µg)      | 7.8 ± 0.1                | 79.2 ± 1.1           |                     | 6.7 ± 0.1                | 87.3 ± 1.0           |                     | 7.3 ± 0.1                | 82.7 ± 1.0 <sup>a</sup> |                         | 6.0 ± 0.1                | 90.8 ± 0.8 <sup>b</sup> |                          |
| Vitamin E (mg)      | 4.2 ± 0.1                | 75.7 ± 1.4           |                     | 4.6 ± 0.1                | 65.4 ± 1.5           |                     | 4.4 ± 0.1                | 70.9 ± 1.3              |                         | 5.4 ± 0.1                | 67.6 ± 1.3              |                          |
| Calcium (mg)        | 1018 ± 12                | 3.0 ± 0.4            |                     | 973.3 ± 13.5             | 4.1 ± 0.5            |                     | 994.3 ± 11.3             | 3.6 ± 0.4 <sup>a</sup>  |                         | 962.8 ± 11.3             | 30.4 ± 1.2 <sup>b</sup> |                          |
| Iron (mg)           | 9.9 ± 0.1                | 1.2 ± 0.2            |                     | 10.7 ± 0.1               | 0.6 ± 0.1            |                     | 10.3 ± 0.1               | 0.9 ± 0.1               |                         | 12.8 ± 0.1               | 1.3 ± 0.2               |                          |
| Magnesium (mg)      | 185.7 ± 1.6              | 0.0 ± 0.0            |                     | 193.3 ± 1.8              | 0.0 ± 0.0            |                     | 188.5 ± 1.5              | 0.0 ± 0.0 <sup>a</sup>  |                         | 207.6 ± 1.7              | 0.9 ± 0.2 <sup>b</sup>  |                          |
| Phosphorus (mg)     | 1051 ± 10                | 0.1 ± 0.02           |                     | 1064 ± 11                | 0.0 ± 0.0            |                     | 1054 ± 9                 | 0.1 ± 0.0               |                         | 1130 ± 10                | 0.0 ± 0.0               |                          |
| Choline (mg)        | 209.7 ± 2.4              |                      | 51.1 ± 1.7          | 212.1 ± 3.2              |                      | 52.6 ± 1.8          | 209.8 ± 2.4              |                         | 51.7 ± 1.5 <sup>a</sup> | 218.1 ± 3                |                         | 27.1 ± 1.7 <sup>b</sup>  |
| Sodium (mg)         | 1939 ± 19                |                      | 99.5 ± 0.1          | 2176 ± 20                |                      | 99.9 ± 0.0          | 2040 ± 16                |                         | 99.7 ± 0.1 <sup>a</sup> | 2591 ± 22                |                         | 100.0 ± 0.0 <sup>b</sup> |
| Potassium (mg)      | 1994 ± 18                |                      | 44.5 ± 1.5          | 2007 ± 19                |                      | 46.8 ± 1.4          | 1995 ± 16                |                         | 45.1 ± 1.3 <sup>a</sup> | 2048 ± 21                |                         | 30.1 ± 1.4 <sup>b</sup>  |
| Zinc (mg)           | 7.7 ± 0.1                | 0.0 ± 0.0            |                     | 8.0 ± 0.0                | 0.0 ± 0.0            |                     | 0.0 ± 0.0                | 0.1 ± 0.1               |                         | 9.1 ± 0.1                | 0.3 ± 0.1               |                          |

<sup>1</sup>Values are means ± standard error for nutrients from food and beverage intake during two 24-h dietary recalls completed by parents.

<sup>2</sup>Determined via cut-point method using usual intakes as estimated using the National Cancer Institute method employing use of both dietary recalls compared to recommended intakes.

AI: Acceptable Intake; DFE: Dietary Folate Equivalent; EAR: Estimated Average Requirement; RAE: Retinol Activity Equivalent

<sup>a,b</sup>Percentages with different superscripts are significantly different using z-scores, p<0.05

**TABLE S2a. Mean nutrient intake of children 1-2 years and proportion not meeting DRIs by Ethnicity (NHANES 2011-2016)**

| Nutrient                  | Non-Hispanic White           |                             |                             | Non-Hispanic Black           |                             |                              | Hispanic                     |                             |                             | Asian                        |                               |                               |
|---------------------------|------------------------------|-----------------------------|-----------------------------|------------------------------|-----------------------------|------------------------------|------------------------------|-----------------------------|-----------------------------|------------------------------|-------------------------------|-------------------------------|
|                           | Mean $\pm$ S.E. <sup>1</sup> | % < EAR <sup>2</sup>        | % > AI <sup>2</sup>         | Mean $\pm$ S.E. <sup>1</sup> | % < EAR <sup>2</sup>        | % > AI <sup>2</sup>          | Mean $\pm$ S.E. <sup>1</sup> | % < EAR <sup>2</sup>        | % > AI <sup>2</sup>         | Mean $\pm$ S.E. <sup>1</sup> | % < EAR <sup>2</sup>          | % > AI <sup>2</sup>           |
| Dietary Fiber (g)         | 10.2 $\pm$ 0.3               |                             | 0.7 $\pm$ 0.4               | 9.8 $\pm$ 0.3                |                             | 0.5 $\pm$ 0.3                | 9.6 $\pm$ 0.3                |                             | 1 $\pm$ 0.6                 | 9 $\pm$ 0.5                  |                               | 1.3 $\pm$ 1                   |
| Vitamin A, RAE ( $\mu$ g) | 591.8 $\pm$ 18               | 0.4 $\pm$ 0.3               |                             | 523.6 $\pm$ 17.4             | 0.9 $\pm$ 1                 |                              | 541.9 $\pm$ 16.1             | 0.02 $\pm$ 0.1              |                             | 532.9 $\pm$ 32.7             | 0.1 $\pm$ 0.3                 |                               |
| Thiamin (mg)              | 1.1 $\pm$ 0                  | 0 $\pm$ 0                   |                             | 1.1 $\pm$ 0                  | 0.1 $\pm$ 0.1               |                              | 1.1 $\pm$ 0                  | 0.1 $\pm$ 0.1               |                             | 1.1 $\pm$ 0.1                | 0.0 $\pm$ 0.1                 |                               |
| Riboflavin (mg)           | 1.7 $\pm$ 0                  | 0 $\pm$ 0                   |                             | 1.6 $\pm$ 0                  | 0 $\pm$ 0                   |                              | 1.7 $\pm$ 0                  | 0 $\pm$ 0                   |                             | 1.7 $\pm$ 0.1                | 0 $\pm$ 0                     |                               |
| Niacin (mg)               | 12.9 $\pm$ 0.4               | 0.2 $\pm$ 0.2               |                             | 14.1 $\pm$ 0.4               | 0.2 $\pm$ 0.1               |                              | 12 $\pm$ 0.4                 | 0.5 $\pm$ 0.4               |                             | 12 $\pm$ 0.8                 | 2.1 $\pm$ 1.9                 |                               |
| Vitamin B6 (mg)           | 1.2 $\pm$ 0                  | 0 $\pm$ 0                   |                             | 1.3 $\pm$ 0                  | 0.0 $\pm$ 0.1               |                              | 1.2 $\pm$ 0                  | 0 $\pm$ 0                   |                             | 1.2 $\pm$ 0.1                | 0.0 $\pm$ 0.2                 |                               |
| Folate DFE ( $\mu$ g)     | 345.3 $\pm$ 13.1             | 0 $\pm$ 0                   |                             | 340.1 $\pm$ 13.2             | 0.8 $\pm$ 0.6               |                              | 347.8 $\pm$ 16.2             | 0.5 $\pm$ 0.3               |                             | 362.2 $\pm$ 30.8             | 0.1 $\pm$ 0.2                 |                               |
| Vitamin B12 ( $\mu$ g)    | 4 $\pm$ 0.1                  | 0 $\pm$ 0                   |                             | 3.7 $\pm$ 0.2                | 0.0 $\pm$ 0.1               |                              | 4 $\pm$ 0.1                  | 0 $\pm$ 0                   |                             | 4.3 $\pm$ 0.3                | 0 $\pm$ 0                     |                               |
| Vitamin C (mg)            | 73.2 $\pm$ 5.9               | 0.7 $\pm$ 0.4               |                             | 103.1 $\pm$ 5.8              | 0.0 $\pm$ 0.1               |                              | 78.3 $\pm$ 4                 | 0.0 $\pm$ 0.1               |                             | 68.2 $\pm$ 9.7               | 3.4 $\pm$ 2.1                 |                               |
| Vitamin D ( $\mu$ g)      | 7.2 $\pm$ 0.3                | 84.2 $\pm$ 2.2 <sup>a</sup> |                             | 6.1 $\pm$ 0.3                | 92.7 $\pm$ 1.9 <sup>b</sup> |                              | 7.7 $\pm$ 0.3                | 80.5 $\pm$ 2.8 <sup>a</sup> |                             | 8.3 $\pm$ 0.5                | 74 $\pm$ 7 <sup>a</sup>       |                               |
| Vitamin E (mg)            | 4.8 $\pm$ 0.2                | 58.8 $\pm$ 4.1 <sup>a</sup> |                             | 5.3 $\pm$ 0.2                | 49.4 $\pm$ 4.6 <sup>a</sup> |                              | 4.3 $\pm$ 0.1                | 71.1 $\pm$ 3.4 <sup>b</sup> |                             | 4.7 $\pm$ 0.4                | 65.6 $\pm$ 12.2 <sup>ab</sup> |                               |
| Calcium (mg)              | 1021 $\pm$ 28                | 1.3 $\pm$ 0.7 <sup>a</sup>  |                             | 857.0 $\pm$ 29               | 9.7 $\pm$ 3 <sup>b</sup>    |                              | 997.2 $\pm$ 26.8             | 1.6 $\pm$ 0.8 <sup>a</sup>  |                             | 963.6 $\pm$ 36.4             | 2.2 $\pm$ 2 <sup>a</sup>      |                               |
| Iron (mg)                 | 9.4 $\pm$ 0.3                | 1.6 $\pm$ 0.4               |                             | 10.3 $\pm$ 0.3               | 1.0 $\pm$ 0.4               |                              | 9.5 $\pm$ 0.4                | 2.2 $\pm$ 0.5               |                             | 10 $\pm$ 1                   | 1.0 $\pm$ 1.3                 |                               |
| Magnesium (mg)            | 184.6 $\pm$ 3.9              | 0 $\pm$ 0                   |                             | 180.3 $\pm$ 3.7              | 0.1 $\pm$ 0.1               |                              | 179.6 $\pm$ 3.5              | 0 $\pm$ 0                   |                             | 174.6 $\pm$ 4.7              | 0.0 $\pm$ 0.1                 |                               |
| Phosphorus (mg)           | 1037 $\pm$ 20                | 0 $\pm$ 0                   |                             | 952.8 $\pm$ 24.2             | 0.2 $\pm$ 0.3               |                              | 1014 $\pm$ 24                | 0 $\pm$ 0                   |                             | 967.2 $\pm$ 31               | 0.1 $\pm$ 0.1                 |                               |
| Choline (mg)              | 196.9 $\pm$ 5.5              |                             | 41.6 $\pm$ 3.6 <sup>a</sup> | 202.8 $\pm$ 7.6              |                             | 47.2 $\pm$ 5.4 <sup>a</sup>  | 224.7 $\pm$ 7                |                             | 63.9 $\pm$ 3.4 <sup>b</sup> | 216.4 $\pm$ 16.9             |                               | 52.5 $\pm$ 11.3 <sup>ab</sup> |
| Sodium (mg)               | 1817 $\pm$ 46                |                             | 99.4 $\pm$ 0.6              | 1981 $\pm$ 60                |                             | 99.4 $\pm$ 0.4               | 1757 $\pm$ 43                |                             | 99.5 $\pm$ 0.3              | 1608 $\pm$ 88                |                               | 98.7 $\pm$ 1.2                |
| Potassium (mg)            | 1826 $\pm$ 36                |                             | 29.8 $\pm$ 3.2 <sup>a</sup> | 1881 $\pm$ 39                |                             | 38.9 $\pm$ 3.8 <sup>ab</sup> | 1924 $\pm$ 39                |                             | 39 $\pm$ 3.3 <sup>b</sup>   | 1789 $\pm$ 63                |                               | 31.2 $\pm$ 7.8 <sup>ab</sup>  |
| Zinc (mg)                 | 7.4 $\pm$ 0.2                | 0 $\pm$ 0                   |                             | 7 $\pm$ 0.2                  | 0.1 $\pm$ 0.1               |                              | 7 $\pm$ 0.2                  | 0.0 $\pm$ 0.1               |                             | 7.2 $\pm$ 0.4                | 0 $\pm$ 0                     |                               |

<sup>1</sup>Values are means  $\pm$  standard error for nutrients from food and beverage intake during two 24-h dietary recalls completed by parents.

<sup>2</sup>Determined via cut-point method using usual intakes as estimated using the National Cancer Institute method employing use of both dietary recalls compared to recommended intakes.

AI: Acceptable Intake; DFE: Dietary Folate Equivalent; EAR: Estimated Average Requirement; RAE: Retinol Activity Equivalent

<sup>ab</sup>Percentages with different superscripts are significantly different using z-scores,  $p < 0.05$

**TABLE S2b. Mean nutrient intake of children 2-3 years and proportion not meeting DRIs by Ethnicity (NHANES 2011-2016)**

| Nutrient            | Non-Hispanic White       |                         |                         | Non-Hispanic Black       |                         |                         | Hispanic                 |                         |                         | Asian                    |                           |                           |
|---------------------|--------------------------|-------------------------|-------------------------|--------------------------|-------------------------|-------------------------|--------------------------|-------------------------|-------------------------|--------------------------|---------------------------|---------------------------|
|                     | Mean ± S.E. <sup>1</sup> | % < EAR <sup>2</sup>    | % > AI <sup>2</sup>     | Mean ± S.E. <sup>1</sup> | % < EAR <sup>2</sup>    | % > AI <sup>2</sup>     | Mean ± S.E. <sup>1</sup> | % < EAR <sup>2</sup>    | % > AI <sup>2</sup>     | Mean ± S.E. <sup>1</sup> | % < EAR <sup>2</sup>      | % > AI <sup>2</sup>       |
| Dietary Fiber (g)   | 10.8 ± 0.4               |                         | 1.5 ± 0.7               | 10.8 ± 0.3               |                         | 1.1 ± 0.6               | 11.3 ± 0.3               |                         | 3.4 ± 1.3               | 10.2 ± 0.9               |                           | 2.8 ± 3                   |
| Vitamin A, RAE (µg) | 584.3 ± 17               | 0.4 ± 0.3               |                         | 500.6 ± 17.1             | 1.1 ± 1.2               |                         | 545.1 ± 28.1             | 0 ± 0.1                 |                         | 540.5 ± 38.0             | 00 ± 0.2                  |                           |
| Thiamin (mg)        | 1.1 ± 0                  | 0 ± 0                   |                         | 1.2 ± 0                  | 0.0 ± 0.1               |                         | 1.2 ± 0                  | 0 ± 0                   |                         | 1.3 ± 0.1                | 0 ± 0                     |                           |
| Riboflavin (mg)     | 1.7 ± 0                  | 0 ± 0                   |                         | 1.7 ± 0                  | 0 ± 0                   |                         | 1.8 ± 0.1                | 0 ± 0                   |                         | 1.8 ± 0.1                | 0 ± 0                     |                           |
| Niacin (mg)         | 14.1 ± 0.4               | 0.1 ± 0.1               |                         | 16.5 ± 0.5               | 0 ± 0                   |                         | 14.5 ± 0.5               | 0 ± 0                   |                         | 14.9 ± 1.5               | 0.2 ± 0.5                 |                           |
| Vitamin B6 (mg)     | 1.3 ± 0                  | 0 ± 0                   |                         | 1.4 ± 0                  | 0 ± 0                   |                         | 1.4 ± 0                  | 0 ± 0                   |                         | 1.5 ± 0.1                | 0 ± 0                     |                           |
| Folate DFE (µg)     | 380.3 ± 12.5             | 0 ± 0                   |                         | 396.7 ± 13.8             | 0.2 ± 0.2               |                         | 399 ± 14.3               | 0.1 ± 0.1               |                         | 437.2 ± 38               | 0 ± 0                     |                           |
| Vitamin B12 (µg)    | 4 ± 0.1                  | 0 ± 0                   |                         | 3.7 ± 0.2                | 0.0 ± 0.1               |                         | 4.1 ± 0.2                | 0 ± 0                   |                         | 4.7 ± 0.5                | 0 ± 0                     |                           |
| Vitamin C (mg)      | 72.7 ± 5.5               | 0.7 ± 0.4               |                         | 100.1 ± 5                | 0.1 ± 0.1               |                         | 86.5 ± 4.9               | 0 ± 0                   |                         | 69.9 ± 8.6               | 3.4 ± 2.5                 |                           |
| Vitamin D (µg)      | 6.4 ± 0.2                | 90.1 ± 1.4 <sup>a</sup> |                         | 5.7 ± 0.2                | 96.1 ± 1.4 <sup>b</sup> |                         | 6.9 ± 0.3                | 88.3 ± 2.5 <sup>a</sup> |                         | 8.4 ± 1.2                | 76.1 ± 10.8 <sup>ab</sup> |                           |
| Vitamin E (mg)      | 5.2 ± 0.2                | 48.6 ± 4.5              |                         | 5.9 ± 0.3                | 40.9 ± 5.3              |                         | 5.2 ± 0.2                | 50.5 ± 4.2              |                         | 5.3 ± 0.4                | 48.5 ± 10                 |                           |
| Calcium (mg)        | 983.2 ± 33               | 1.9 ± 0.9 <sup>a</sup>  |                         | 839.1 ± 25.2             | 11.9 ± 3.2 <sup>b</sup> |                         | 1020.2 ± 45.5            | 1.6 ± 1.1 <sup>a</sup>  |                         | 952.8 ± 72.8             | 2.1 ± 1.5 <sup>a</sup>    |                           |
| Iron (mg)           | 9.8 ± 0.3                | 1.1 ± 0.3               |                         | 10.9 ± 0.2               | 0.5 ± 0.2               |                         | 10.8 ± 0.4               | 0.6 ± 0.2               |                         | 10.8 ± 0.7               | 0.3 ± 0.4                 |                           |
| Magnesium (mg)      | 190.6 ± 4.8              | 0 ± 0                   |                         | 194.6 ± 4.7              | 0 ± 0                   |                         | 194.9 ± 5.4              | 0 ± 0                   |                         | 196.5 ± 15.5             | 0 ± 0                     |                           |
| Phosphorus (mg)     | 1061 ± 26                | 0 ± 0                   |                         | 1008 ± 26                | 0.1 ± 0.2               |                         | 1084 ± 36                | 0 ± 0                   |                         | 1076 ± 83                | 0 ± 0                     |                           |
| Choline (mg)        | 204.6 ± 7.5              |                         | 45.3 ± 4.4 <sup>a</sup> | 216 ± 6.5                |                         | 51.5 ± 4.7 <sup>a</sup> | 231.9 ± 7.9              |                         | 70.8 ± 4.3 <sup>b</sup> | 232.7 ± 20.7             |                           | 66.5 ± 10.3 <sup>ab</sup> |
| Sodium (mg)         | 2031 ± 51                |                         | 99.9 ± 0.1              | 2259 ± 64                |                         | 99.9 ± 0.1              | 2129 ± 67                |                         | 100 ± 0.1               | 1992 ± 147               |                           | 99.9 ± 0.2                |
| Potassium (mg)      | 1877 ± 49                |                         | 35.9 ± 4.1              | 1968 ± 53                |                         | 41.6 ± 4.7              | 2009 ± 61                |                         | 47.1 ± 5                | 1967 ± 192               |                           | 44.2 ± 11.4               |
| Zinc (mg)           | 7.6 ± 0.2                | 0 ± 0                   |                         | 7.6 ± 0.2                | 0.1 ± 0.1               |                         | 7.8 ± 0.3                | 0 ± 0                   |                         | 7.6 ± 0.6                | 0 ± 0                     |                           |

<sup>1</sup>Values are means ± standard error for nutrients from food and beverage intake during two 24-h dietary recalls completed by parents.

<sup>2</sup>Determined via cut-point method using usual intakes as estimated using the National Cancer Institute method employing use of both dietary recalls compared to recommended intakes.

AI: Acceptable Intake; DFE: Dietary Folate Equivalent; EAR: Estimated Average Requirement; RAE: Retinol Activity Equivalent

<sup>ab</sup>Percentages with different superscripts are significantly different using z-scores, p<0.05

**TABLE S2c. Mean nutrient intake of children 1-3 years and proportion not meeting DRIs by Ethnicity (NHANES 2011-2016)**

| Nutrient            | Non-Hispanic White       |                         |                         | Non-Hispanic Black       |                         |                         | Hispanic                 |                         |                         | Asian                    |                          |                          |
|---------------------|--------------------------|-------------------------|-------------------------|--------------------------|-------------------------|-------------------------|--------------------------|-------------------------|-------------------------|--------------------------|--------------------------|--------------------------|
|                     | Mean ± S.E. <sup>1</sup> | % < EAR <sup>2</sup>    | % > AI <sup>2</sup>     | Mean ± S.E. <sup>1</sup> | % < EAR <sup>2</sup>    | % > AI <sup>2</sup>     | Mean ± S.E. <sup>1</sup> | % < EAR <sup>2</sup>    | % > AI <sup>2</sup>     | Mean ± S.E. <sup>1</sup> | % < EAR <sup>2</sup>     | % > AI <sup>2</sup>      |
| Dietary Fiber (g)   | 10.4 ± 0.3               |                         | 1.1 ± 0.5               | 10.3 ± 0.3               |                         | 0.9 ± 0.5               | 10.4 ± 0.3               |                         | 2.5 ± 0.9               | 9.6 ± 0.7                |                          | 2.3 ± 2.1                |
| Vitamin A, RAE (µg) | 584.6 ± 13.8             | 0.4 ± 0.3               |                         | 510.9 ± 12.9             | 0.9 ± 1.1               |                         | 545.4 ± 21.1             | 0 ± 0.1                 |                         | 543.5 ± 27.8             | 0 ± 0.2                  |                          |
| Thiamin (mg)        | 1.1 ± 0                  | 0 ± 0                   |                         | 1.2 ± 0                  | 0.1 ± 0.1               |                         | 1.1 ± 0                  | 0.1 ± 0.1               |                         | 1.2 ± 0.1                | 0 ± 0.1                  |                          |
| Riboflavin (mg)     | 1.7 ± 0                  | 0 ± 0                   |                         | 1.6 ± 0                  | 0 ± 0                   |                         | 1.7 ± 0                  | 0 ± 0                   |                         | 1.8 ± 0.1                | 0 ± 0                    |                          |
| Niacin (mg)         | 13.6 ± 0.3               | 0.2 ± 0.1               |                         | 15.3 ± 0.5               | 0.1 ± 0.1               |                         | 13.2 ± 0.3               | 0.3 ± 0.2               |                         | 13.7 ± 1                 | 1.3 ± 1.1                |                          |
| Vitamin B6 (mg)     | 1.2 ± 0                  | 0 ± 0                   |                         | 1.3 ± 0                  | 0 ± 0                   |                         | 1.3 ± 0                  | 0 ± 0                   |                         | 1.4 ± 0.1                | 0.1 ± 0.1                |                          |
| Folate DFE (µg)     | 364.9 ± 10.1             | 0 ± 0 <sup>a</sup>      |                         | 367.1 ± 12.3             | 0.6 ± 0.4 <sup>ab</sup> |                         | 368.3 ± 11.1             | 0.4 ± 0.2 <sup>b</sup>  |                         | 412 ± 25.9               | 0 ± 0.1 <sup>ab</sup>    |                          |
| Vitamin B12 (µg)    | 4 ± 0.1                  | 0 ± 0                   |                         | 3.7 ± 0.1                | 0 ± 0                   |                         | 4.1 ± 0.1                | 0 ± 0                   |                         | 4.6 ± 0.3                | 0 ± 0                    |                          |
| Vitamin C (mg)      | 71.7 ± 4                 | 0.6 ± 0.3 <sup>a</sup>  |                         | 100.6 ± 4.3              | 0.1 ± 0.1 <sup>ab</sup> |                         | 82 ± 3.6                 | 0 ± 0 <sup>b</sup>      |                         | 70.2 ± 7                 | 3.1 ± 1.7 <sup>ab</sup>  |                          |
| Vitamin D (µg)      | 6.9 ± 0.2                | 86.6 ± 1.7 <sup>a</sup> |                         | 6 ± 0.2                  | 93.9 ± 1.6 <sup>b</sup> |                         | 7.3 ± 0.3                | 84.1 ± 2.5 <sup>a</sup> |                         | 8.6 ± 0.8                | 72.1 ± 8.8 <sup>a</sup>  |                          |
| Vitamin E (mg)      | 5 ± 0.2                  | 53 ± 4.1 <sup>ab</sup>  |                         | 5.7 ± 0.2                | 43.8 ± 4.9 <sup>a</sup> |                         | 4.7 ± 0.1                | 60.6 ± 2.9 <sup>b</sup> |                         | 5.1 ± 0.3                | 54.8 ± 7.5 <sup>ab</sup> |                          |
| Calcium (mg)        | 997.9 ± 27.5             | 1.7 ± 0.9 <sup>a</sup>  |                         | 856.8 ± 21.3             | 10.2 ± 2.8 <sup>b</sup> |                         | 1003 ± 30                | 1.5 ± 0.9 <sup>a</sup>  |                         | 974.9 ± 51.8             | 1.8 ± 1.5 <sup>a</sup>   |                          |
| Iron (mg)           | 9.7 ± 0.2                | 1.1 ± 0.3               |                         | 10.5 ± 0.2               | 0.7 ± 0.3               |                         | 10.1 ± 0.3               | 1.5 ± 0.4               |                         | 10.7 ± 0.7               | 0.5 ± 0.7                |                          |
| Magnesium (mg)      | 186.9 ± 3.9              | 0 ± 0                   |                         | 188.6 ± 4.1              | 0.0 ± 0.1               |                         | 186.2 ± 3.6              | 0 ± 0                   |                         | 188.4 ± 11               | 0 ± 0.1                  |                          |
| Phosphorus (mg)     | 1045 ± 20                | 0 ± 0                   |                         | 986.7 ± 21.6             | 0.1 ± 0.2               |                         | 1046 ± 24                | 0 ± 0                   |                         | 1036 ± 59                | 0 ± 0.1                  |                          |
| Choline (mg)        | 203.1 ± 5.8              |                         | 44.8 ± 3.8 <sup>a</sup> | 211.5 ± 5.6              |                         | 51.5 ± 4.3 <sup>a</sup> | 226.1 ± 5.7              |                         | 66.7 ± 3.2 <sup>b</sup> | 224.6 ± 16.7             |                          | 62.9 ± 9.1 <sup>ab</sup> |
| Sodium (mg)         | 1922 ± 45                |                         | 99.6 ± 0.4              | 2117 ± 58                |                         | 99.6 ± 0.2              | 1934 ± 47                |                         | 99.7 ± 0.2              | 1825 ± 116               |                          | 99.4 ± 0.7               |
| Potassium (mg)      | 1856 ± 39                |                         | 33.4 ± 3.6 <sup>a</sup> | 1928 ± 43                |                         | 41.2 ± 4 <sup>ab</sup>  | 1955 ± 40                |                         | 43.2 ± 3.4 <sup>b</sup> | 1907 ± 139               |                          | 39.8 ± 8.9 <sup>ab</sup> |
| Zinc (mg)           | 7.6 ± 0.1                | 0 ± 0                   |                         | 7.3 ± 0.2                | 0.1 ± 0.1               |                         | 7.3 ± 0.2                | 0 ± 0                   |                         | 7.5 ± 0.4                | 0 ± 0                    |                          |

<sup>1</sup>Values are means ± standard error for nutrients from food and beverage intake during two 24-h dietary recalls completed by parents.

<sup>2</sup>Determined via cut-point method using usual intakes as estimated using the National Cancer Institute method employing use of both dietary recalls compared to recommended intakes.

AI: Acceptable Intake; DFE: Dietary Folate Equivalent; EAR: Estimated Average Requirement; RAE: Retinol Activity Equivalent

<sup>ab</sup>Percentages with different superscripts are significantly different using z-scores, p<0.05

**TABLE S2d. Mean nutrient intake of children 4-6 years and proportion not meeting DRIs by Ethnicity (NHANES 2011-2016)**

| Nutrient            | Non-Hispanic White       |                          |                         | Non-Hispanic Black       |                         |                         | Hispanic                 |                         |                         | Asian                    |                         |                         |
|---------------------|--------------------------|--------------------------|-------------------------|--------------------------|-------------------------|-------------------------|--------------------------|-------------------------|-------------------------|--------------------------|-------------------------|-------------------------|
|                     | Mean ± S.E. <sup>1</sup> | % < EAR <sup>2</sup>     | % > AI <sup>2</sup>     | Mean ± S.E. <sup>1</sup> | % < EAR <sup>2</sup>    | % > AI <sup>2</sup>     | Mean ± S.E. <sup>1</sup> | % < EAR <sup>2</sup>    | % > AI <sup>2</sup>     | Mean ± S.E. <sup>1</sup> | % < EAR <sup>2</sup>    | % > AI <sup>2</sup>     |
| Dietary Fiber (g)   | 12.3 ± 0.3               |                          | 0.1 ± 0.1               | 13.3 ± 0.5               |                         | 0.2 ± 0.2               | 13.7 ± 0.4               |                         | 0.7 ± 0.4               | 12.6 ± 0.7               |                         | 0.9 ± 0.9               |
| Vitamin A, RAE (µg) | 600.0 ± 21.2             | 1.8 ± 1.1                |                         | 535.1 ± 25.9             | 2.5 ± 2.3               |                         | 576.9 ± 22.7             | 0.2 ± 0.4               |                         | 584.0 ± 34.1             | 0.5 ± 0.8               |                         |
| Thiamin (mg)        | 1.3 ± 0                  | 0 ± 0                    |                         | 1.4 ± 0                  | 0 ± 0                   |                         | 1.4 ± 0                  | 0 ± 0                   |                         | 1.4 ± 0.1                | 0 ± 0                   |                         |
| Riboflavin (mg)     | 1.7 ± 0                  | 0 ± 0                    |                         | 1.8 ± 0.1                | 0 ± 0                   |                         | 1.8 ± 0.1                | 0 ± 0                   |                         | 1.8 ± 0.1                | 0 ± 0                   |                         |
| Niacin (mg)         | 16.8 ± 0.5               | 0.0 ± 0.1                |                         | 19.8 ± 0.5               | 0 ± 0                   |                         | 18.4 ± 0.5               | 0 ± 0                   |                         | 17.2 ± 0.9               | 0.1 ± 0.2               |                         |
| Vitamin B6 (mg)     | 1.3 ± 0                  | 0 ± 0                    |                         | 1.6 ± 0                  | 0 ± 0                   |                         | 1.6 ± 0                  | 0 ± 0                   |                         | 1.6 ± 0.1                | 0 ± 0                   |                         |
| Folate DFE (µg)     | 436.6 ± 12.6             | 0.0 ± 0.1                |                         | 459.3 ± 13.6             | 0.2 ± 0.2               |                         | 483.4 ± 14.6             | 0.1 ± 0.1               |                         | 494.4 ± 31.3             | 0 ± 0.1                 |                         |
| Vitamin B12 (µg)    | 3.9 ± 0.1                | 0.0 ± 0.1                |                         | 4.2 ± 0.2                | 0.1 ± 0.1               |                         | 4.5 ± 0.2                | 0 ± 0                   |                         | 4.6 ± 0.4                | 0 ± 0                   |                         |
| Vitamin C (mg)      | 67.1 ± 5.6               | 4.9 ± 1.9 <sup>a</sup>   |                         | 89.1 ± 2.9               | 0.7 ± 0.3 <sup>b</sup>  |                         | 86.5 ± 4.4               | 0.3 ± 0.2 <sup>b</sup>  |                         | 64.3 ± 6.9               | 9.4 ± 3.8 <sup>a</sup>  |                         |
| Vitamin D (µg)      | 5.6 ± 0.3                | 94.3 ± 1.7 <sup>ab</sup> |                         | 5.1 ± 0.2                | 96.1 ± 1.2 <sup>a</sup> |                         | 6 ± 0.3                  | 93 ± 1.7 <sup>ab</sup>  |                         | 6.5 ± 0.4                | 86.5 ± 4.6 <sup>b</sup> |                         |
| Vitamin E (mg)      | 6.1 ± 0.2                | 53.1 ± 4.1 <sup>a</sup>  |                         | 6.9 ± 0.2                | 36.5 ± 3.6 <sup>b</sup> |                         | 5.8 ± 0.2                | 60.5 ± 3.7 <sup>a</sup> |                         | 6.2 ± 0.4                | 42.2 ± 12 <sup>ab</sup> |                         |
| Calcium (mg)        | 958.1 ± 31.2             | 27.9 ± 4 <sup>a</sup>    |                         | 879.7 ± 28.8             | 40.7 ± 4.5 <sup>b</sup> |                         | 985.8 ± 29.9             | 24.2 ± 4 <sup>a</sup>   |                         | 943.7 ± 45.8             | 28.2 ± 6.1 <sup>a</sup> |                         |
| Iron (mg)           | 11.7 ± 0.2               | 2.1 ± 0.3 <sup>a</sup>   |                         | 13.2 ± 0.4               | 1.0 ± 0.4 <sup>a</sup>  |                         | 13.4 ± 0.4               | 1.3 ± 0.3 <sup>ab</sup> |                         | 12.2 ± 0.6               | 0.8 ± 0.8 <sup>ab</sup> |                         |
| Magnesium (mg)      | 204.4 ± 4.8              | 0.7 ± 0.4                |                         | 212.8 ± 6.1              | 0.8 ± 0.5               |                         | 211.5 ± 4                | 0.4 ± 0.2               |                         | 216.8 ± 9.8              | 0.7 ± 0.6               |                         |
| Phosphorus (mg)     | 1107 ± 30                | 0 ± 0                    |                         | 1116 ± 30                | 0.0 ± 0.1               |                         | 1158 ± 24                | 0 ± 0                   |                         | 1121 ± 45                | 0 ± 0                   |                         |
| Choline (mg)        | 201 ± 6.2                |                          | 19.1 ± 3.3 <sup>a</sup> | 225.2 ± 9.2              |                         | 33.4 ± 4.9 <sup>b</sup> | 233.1 ± 6.6              |                         | 33 ± 4.1 <sup>b</sup>   | 257.8 ± 15.1             |                         | 47.8 ± 6.6 <sup>b</sup> |
| Sodium (mg)         | 2421 ± 69                |                          | 99.9 ± 0.1              | 2782 ± 83                |                         | 99.9 ± 0.1              | 2526 ± 48                |                         | 100.0 ± 0.0             | 2488 ± 116               |                         | 100.0 ± 0.1             |
| Potassium (mg)      | 1896 ± 55                |                          | 18.4 ± 3.2 <sup>a</sup> | 2078 ± 53                |                         | 31.2 ± 3.4 <sup>b</sup> | 2097 ± 41                |                         | 31.7 ± 2.7 <sup>b</sup> | 2031 ± 85                |                         | 28.9 ± 7 <sup>ab</sup>  |
| Zinc (mg)           | 8.1 ± 0.2                | 0.3 ± 0.2                |                         | 9.1 ± 0.3                | 0.6 ± 0.4               |                         | 9 ± 0.2                  | 0.2 ± 0.2               |                         | 9.9 ± 0.8                | 0.0 ± 0.1               |                         |

<sup>1</sup>Values are means ± standard error for nutrients from food and beverage intake during two 24-h dietary recalls completed by parents.

<sup>2</sup>Determined via cut-point method using usual intakes as estimated using the National Cancer Institute method employing use of both dietary recalls compared to recommended intakes.

AI: Acceptable Intake; DFE: Dietary Folate Equivalent; EAR: Estimated Average Requirement; RAE: Retinol Activity Equivalent

<sup>ab</sup>Percentages with different superscripts are significantly different using z-scores, p<0.05

**TABLE S3a. Mean nutrient intake of children 1-2 years and proportion not meeting DRIs by Poverty Income Ratio**

| Nutrient            | PIR < 1.3 <sup>1</sup>   |                        |                         | PIR 1.3-1.85 <sup>1</sup> |                         |                          | PIR ≥ 1.85 <sup>1</sup>  |                        |                         |
|---------------------|--------------------------|------------------------|-------------------------|---------------------------|-------------------------|--------------------------|--------------------------|------------------------|-------------------------|
|                     | Mean ± S.E. <sup>2</sup> | % < EAR <sup>3</sup>   | % > AI <sup>3</sup>     | Mean ± S.E. <sup>2</sup>  | % < EAR <sup>3</sup>    | % > AI <sup>3</sup>      | Mean ± S.E. <sup>2</sup> | % < EAR <sup>3</sup>   | % > AI <sup>3</sup>     |
| Dietary Fiber (g)   | 9.2 ± 0.1                |                        | 0.8 ± 0.2               | 9.5 ± 0.4                 |                         | 1.2 ± 0.5                | 9.6 ± 0.2                |                        | 0.4 ± 0.2               |
| Vitamin A, RAE (µg) | 534.4 ± 9.5              | 0.8 ± 0.3              |                         | 560.6 ± 31.7              | 0.2 ± 0.3               |                          | 577.9 ± 12.5             | 0.3 ± 0.2              |                         |
| Thiamin (mg)        | 1.2 ± 0.0                | 0.1 ± 0.0              |                         | 1.1 ± 0                   | 0.1 ± 0.1               |                          | 1.1 ± 0                  | 0 ± 0                  |                         |
| Riboflavin (mg)     | 1.9 ± 0.0                | 0 ± 0                  |                         | 1.9 ± 0.1                 | 0 ± 0                   |                          | 1.9 ± 0                  | 0 ± 0                  |                         |
| Niacin (mg)         | 13.5 ± 0.2               | 0.4 ± 0.1              |                         | 13.1 ± 0.4                | 0.5 ± 0.3               |                          | 12.4 ± 0.2               | 0.2 ± 0.1              |                         |
| Vitamin B6 (mg)     | 1.3 ± 0.0                | 0 ± 0                  |                         | 1.3 ± 0                   | 0.1 ± 0.1               |                          | 1.2 ± 0                  | 0 ± 0                  |                         |
| Folate DFE (µg)     | 369.8 ± 7.4              | 0.3 ± 0.1 <sup>a</sup> |                         | 373.5 ± 15.2              | 0.2 ± 0.2 <sup>ab</sup> |                          | 339.4 ± 6.7              | 0.1 ± 0.1 <sup>b</sup> |                         |
| Vitamin B12 (µg)    | 4.5 ± 0.1                | 0 ± 0                  |                         | 4.5 ± 0.3                 | 0 ± 0                   |                          | 4.2 ± 0.1                | 0 ± 0                  |                         |
| Vitamin C (mg)      | 99.3 ± 3.2               | 0.2 ± 0.1              |                         | 90.2 ± 6.1                | 0.2 ± 0.2               |                          | 76.3 ± 3.1               | 0.5 ± 0.2              |                         |
| Vitamin D (µg)      | 7.8 ± 0.1                | 78.5 ± 1.4             |                         | 7.7 ± 0.3                 | 81.8 ± 2.7              |                          | 7.7 ± 0.2                | 78.9 ± 1.7             |                         |
| Vitamin E (mg)      | 4.3 ± 0.1                | 72.8 ± 1.9             |                         | 4.1 ± 0.2                 | 76.1 ± 3.6              |                          | 4.1 ± 0.1                | 77.5 ± 2.1             |                         |
| Calcium (mg)        | 998 ± 15.8               | 4.0 ± 0.6 <sup>a</sup> |                         | 1012 ± 32                 | 3.3 ± 1.3 <sup>ab</sup> |                          | 1037 ± 19                | 2.1 ± 0.5 <sup>b</sup> |                         |
| Iron (mg)           | 10.4 ± 0.2               | 1.2 ± 0.2              |                         | 10.3 ± 0.4                | 0.9 ± 0.4               |                          | 9.5 ± 0.2                | 1.3 ± 0.2              |                         |
| Magnesium (mg)      | 185.6 ± 2.2              | 0.1 ± 0.0              |                         | 186.6 ± 5.9               | 0.1 ± 0.1               |                          | 185.4 ± 2.4              | 0 ± 0                  |                         |
| Phosphorus (mg)     | 1042 ± 13                | 0.1 ± 0.0              |                         | 1052 ± 28                 | 0.1 ± 0.1               |                          | 1059 ± 16                | 0 ± 0                  |                         |
| Choline (mg)        | 221 ± 4.2                |                        | 57.4 ± 2.7 <sup>a</sup> | 206.5 ± 6.3               |                         | 47.3 ± 4.5 <sup>ab</sup> | 201.4 ± 3.3              |                        | 46.8 ± 2.4 <sup>b</sup> |
| Sodium (mg)         | 2022 ± 28                |                        | 99.5 ± 0.2              | 1943 ± 55                 |                         | 98.9 ± 0.7               | 1869 ± 30                |                        | 99.8 ± 0.1              |
| Potassium (mg)      | 2040 ± 25                |                        | 49 ± 1.8 <sup>a</sup>   | 1975 ± 59                 |                         | 42.7 ± 3.9               | 1958 ± 26                |                        | 40.8 ± 2.2 <sup>b</sup> |
| Zinc (mg)           | 7.9 ± 0.1                | 0 ± 0                  |                         | 7.9 ± 0.2                 | 0.1 ± 0.1               |                          | 7.4 ± 0.1                | 0 ± 0                  |                         |

<sup>1</sup> PIR < 1.3 refers to income less than 1.3 times the poverty level; PIR 1.3 – 1.85 refers to income 1.3 to 1.85 times the poverty level; PIR > 1.85 refers to income greater than 1.85 times the poverty level.

<sup>2</sup> Values are means ± standard error for nutrients from food and beverage intake during two 24-h dietary recalls completed by parents.

<sup>3</sup> Determined via cut-point method using usual intakes as estimated using the National Cancer Institute method employing use of both dietary recalls compared to recommended intakes.

AI: Acceptable Intake; DFE: Dietary Folate Equivalent; EAR: Estimated Average Requirement; PIR: Poverty Income Ratio; RAE: Retinol Activity Equivalent

PIR < 1.3 refers to income less than 1.3 times the poverty level; PIR 1.3 – 1.85 refers to income 1.3 to 1.85 times the poverty level; PIR > 1.85 refers to income greater than 1.85 times the poverty level.

<sup>ab</sup> Percentages with different superscripts are significantly different using z-scores, p < 0.05

**TABLE S3b. Mean nutrient intake of children 2-3 years and proportion not meeting DRIs by Poverty Income Ratio**

| Nutrient            | PIR < 1.3 <sup>1</sup>   |                        |                         | PIR 1.3-1.85 <sup>1</sup> |                         |                          | PIR ≥ 1.85 <sup>1</sup>  |                        |                         |
|---------------------|--------------------------|------------------------|-------------------------|---------------------------|-------------------------|--------------------------|--------------------------|------------------------|-------------------------|
|                     | Mean ± S.E. <sup>2</sup> | % < EAR <sup>3</sup>   | % > AI <sup>3</sup>     | Mean ± S.E. <sup>1</sup>  | % < EAR <sup>2</sup>    | Mean ± S.E. <sup>2</sup> | Mean ± S.E. <sup>2</sup> | % < EAR <sup>3</sup>   | % > AI <sup>3</sup>     |
| Dietary Fiber (g)   | 10.4 ± 0.2               |                        | 1.7 ± 0.4               | 10.9 ± 0.4                |                         | 2.7 ± 1                  | 10.6 ± 0.2               |                        | 0.9 ± 0.3               |
| Vitamin A, RAE (µg) | 518 ± 10.3               | 1.0 ± 0.3              |                         | 553.3 ± 29.4              | 0.2 ± 0.3               |                          | 569.3 ± 12.3             | 0.3 ± 0.2              |                         |
| Thiamin (mg)        | 1.2 ± 0                  | 0 ± 0                  |                         | 1.2 ± 0                   | 0 ± 0                   |                          | 1.1 ± 0                  | 0 ± 0                  |                         |
| Riboflavin (mg)     | 1.8 ± 0                  | 0 ± 0                  |                         | 1.9 ± 0                   | 0 ± 0                   |                          | 1.8 ± 0                  | 0 ± 0                  |                         |
| Niacin (mg)         | 15.2 ± 0.2               | 0 ± 0                  |                         | 15 ± 0.5                  | 0.2 ± 0.2               |                          | 13.7 ± 0.2               | 0.1 ± 0.0              |                         |
| Vitamin B6 (mg)     | 1.4 ± 0                  | 0 ± 0                  |                         | 1.4 ± 0                   | 0 ± 0                   |                          | 1.3 ± 0                  | 0 ± 0                  |                         |
| Folate DFE (µg)     | 422.2 ± 10.3             | 0 ± 0                  |                         | 425.9 ± 19.2              | 0 ± 0                   |                          | 379.2 ± 9.3              | 0 ± 0                  |                         |
| Vitamin B12 (µg)    | 4.5 ± 0.1                | 0 ± 0                  |                         | 4.6 ± 0.3                 | 0 ± 0                   |                          | 4.1 ± 0.1                | 0 ± 0                  |                         |
| Vitamin C (mg)      | 99.4 ± 3                 | 0.2 ± 0.1              |                         | 96.0 ± 5.6                | 0.2 ± 0.2               |                          | 80.1 ± 3.3               | 0.4 ± 0.2              |                         |
| Vitamin D (µg)      | 6.8 ± 0.2                | 86 ± 1.3               |                         | 6.8 ± 0.3                 | 88.8 ± 2.2              |                          | 6.6 ± 0.2                | 87.2 ± 1.4             |                         |
| Vitamin E (mg)      | 4.6 ± 0.1                | 62.5 ± 2               |                         | 4.4 ± 0.1                 | 68.1 ± 3.4              |                          | 4.5 ± 0.1                | 67.6 ± 2.6             |                         |
| Calcium (mg)        | 944 ± 18.9               | 5.4 ± 0.9 <sup>a</sup> |                         | 989.4 ± 40.2              | 4.3 ± 1.7 <sup>ab</sup> |                          | 990.5 ± 20.2             | 2.7 ± 0.6 <sup>b</sup> |                         |
| Iron (mg)           | 11.3 ± 0.2               | 0.4 ± 0.1 <sup>a</sup> |                         | 11.1 ± 0.3                | 0.5 ± 0.2 <sup>ab</sup> |                          | 10.1 ± 0.2               | 0.7 ± 0.1 <sup>b</sup> |                         |
| Magnesium (mg)      | 192 ± 2.8                | 0 ± 0                  |                         | 199.3 ± 5.2               | 0 ± 0                   |                          | 192.2 ± 3.1              | 0 ± 0                  |                         |
| Phosphorus (mg)     | 1054 ± 16                | 0 ± 0                  |                         | 1082 ± 26                 | 0.1 ± 0.1               |                          | 1066 ± 17                | 0 ± 0                  |                         |
| Choline (mg)        | 221 ± 4.4                |                        | 59.5 ± 2.5 <sup>a</sup> | 218 ± 12.7                |                         | 57.8 ± 6.7 <sup>ab</sup> | 205.3 ± 4.2              |                        | 47.6 ± 2.8 <sup>b</sup> |
| Sodium (mg)         | 2272 ± 33                |                        | 99.9 ± 0                | 2223 ± 63                 |                         | 99.8 ± 0.2               | 2085 ± 31                |                        | 100.0 ± 0               |
| Potassium (mg)      | 2034 ± 34                |                        | 49.2 ± 2.3              | 2078 ± 54                 |                         | 50.4 ± 3.4               | 1961 ± 29                |                        | 43.2 ± 2.2              |
| Zinc (mg)           | 8.4 ± 0.2                | 0 ± 0                  |                         | 8.4 ± 0.3                 | 0 ± 0                   |                          | 7.6 ± 0.1                | 0 ± 0                  |                         |

<sup>1</sup> PIR < 1.3 refers to income less than 1.3 times the poverty level; PIR 1.3 – 1.85 refers to income 1.3 to 1.85 times the poverty level; PIR > 1.85 refers to income greater than 1.85 times the poverty level.

<sup>2</sup> Values are means ± standard error for nutrients from food and beverage intake during two 24-h dietary recalls completed by parents.

<sup>3</sup> Determined via cut-point method using usual intakes as estimated using the National Cancer Institute method employing use of both dietary recalls compared to recommended intakes.

AI: Acceptable Intake; DFE: Dietary Folate Equivalent; EAR: Estimated Average Requirement; PIR: Poverty Income Ratio; RAE: Retinol Activity Equivalent

PIR < 1.3 refers to income less than 1.3 times the poverty level; PIR 1.3 – 1.85 refers to income 1.3 to 1.85 times the poverty level; PIR > 1.85 refers to income greater than 1.85 times the poverty level.

<sup>ab</sup> Percentages with different superscripts are significantly different using z-scores, p < 0.05

**TABLE S3c. Mean nutrient intake of children 1-3 years and proportion not meeting DRIs by Poverty Income Ratio**

| Nutrient            | PIR < 1.3 <sup>1</sup>   |                        |                         | PIR 1.3-1.85 <sup>1</sup> |                         |                          | PIR ≥ 1.85 <sup>1</sup>  |                        |                         |
|---------------------|--------------------------|------------------------|-------------------------|---------------------------|-------------------------|--------------------------|--------------------------|------------------------|-------------------------|
|                     | Mean ± S.E. <sup>2</sup> | % < EAR <sup>3</sup>   | % > AI <sup>3</sup>     | Mean ± S.E. <sup>2</sup>  | % < EAR <sup>3</sup>    | % > AI <sup>3</sup>      | Mean ± S.E. <sup>2</sup> | % < EAR <sup>3</sup>   | % > AI <sup>3</sup>     |
| Dietary Fiber (g)   | 9.7 ± 0.1                |                        | 1.2 ± 0.3               | 10.2 ± 0.3                |                         | 2.1 ± 0.7                | 10 ± 0.2                 |                        | 0.7 ± 0.2               |
| Vitamin A, RAE (µg) | 525.1 ± 8.4              | 0.9 ± 0.3              |                         | 543.5 ± 23.1              | 0.2 ± 0.3               |                          | 573.7 ± 10.3             | 0.3 ± 0.2              |                         |
| Thiamin (mg)        | 1.2 ± 0                  | 0 ± 0                  |                         | 1.2 ± 0                   | 0.1 ± 0.1               |                          | 1.1 ± 0                  | 0 ± 0                  |                         |
| Riboflavin (mg)     | 1.9 ± 0                  | 0 ± 0                  |                         | 1.9 ± 0                   | 0 ± 0                   |                          | 1.8 ± 0                  | 0 ± 0                  |                         |
| Niacin (mg)         | 14.1 ± 0.2               | 0.3 ± 0.1              |                         | 14.1 ± 0.4                | 0.3 ± 0.2               |                          | 13.1 ± 0.2               | 0.2 ± 0.1              |                         |
| Vitamin B6 (mg)     | 1.4 ± 0                  | 0 ± 0                  |                         | 1.3 ± 0                   | 0.1 ± 0.1               |                          | 1.2 ± 0                  | 0 ± 0                  |                         |
| Folate DFE (µg)     | 389.8 ± 7.5              | 0.2 ± 0.1 <sup>a</sup> |                         | 398.5 ± 14.8              | 0.1 ± 0.1 <sup>ab</sup> |                          | 359.4 ± 7.1              | 0 ± 0 <sup>b</sup>     |                         |
| Vitamin B12 (µg)    | 4.5 ± 0.1                | 0 ± 0                  |                         | 4.4 ± 0.2                 | 0 ± 0                   |                          | 4.1 ± 0.1                | 0 ± 0                  |                         |
| Vitamin C (mg)      | 97.3 ± 2.6               | 0.2 ± 0.1              |                         | 92.1 ± 4.8                | 0.2 ± 0.2               |                          | 78.1 ± 2.7               | 0.4 ± 0.2              |                         |
| Vitamin D (µg)      | 7.4 ± 0.1                | 81.7 ± 1.2             |                         | 7.1 ± 0.2                 | 85.1 ± 2.1              |                          | 7.2 ± 0.1                | 82.5 ± 1.5             |                         |
| Vitamin E (mg)      | 4.4 ± 0.1                | 68.8 ± 1.7             |                         | 4.3 ± 0.1                 | 70.8 ± 3                |                          | 4.3 ± 0.1                | 72.6 ± 2.2             |                         |
| Calcium (mg)        | 974 ± 15.2               | 4.8 ± 0.8 <sup>a</sup> |                         | 993.3 ± 31.6              | 4 ± 1.5 <sup>ab</sup>   |                          | 1012 ± 17                | 2.5 ± 0.5 <sup>b</sup> |                         |
| Iron (mg)           | 10.8 ± 0.2               | 0.8 ± 0.2              |                         | 10.8 ± 0.3                | 0.6 ± 0.2               |                          | 9.9 ± 0.2                | 1.0 ± 0.2              |                         |
| Magnesium (mg)      | 187.8 ± 2.2              | 0 ± 0                  |                         | 191.1 ± 4.2               | 0.1 ± 0.1               |                          | 187.6 ± 2.5              | 0 ± 0                  |                         |
| Phosphorus (mg)     | 1046 ± 13                | 0.1 ± 0.0              |                         | 1061 ± 21                 | 0.1 ± 0.1               |                          | 1058 ± 14                | 0 ± 0                  |                         |
| Choline (mg)        | 220 ± 3.8                |                        | 57.9 ± 2.4 <sup>a</sup> | 213.3 ± 9                 |                         | 53.5 ± 4.7 <sup>ab</sup> | 202.2 ± 3.1              |                        | 46.1 ± 2.3 <sup>b</sup> |
| Sodium (mg)         | 2122 ± 26                |                        | 99.6 ± 0.1              | 2082 ± 53                 |                         | 99.4 ± 0.5               | 1965 ± 27                |                        | 99.8 ± 0.1              |
| Potassium (mg)      | 2030 ± 26                |                        | 48.4 ± 1.8              | 2016 ± 43                 |                         | 46.9 ± 2.8               | 1955 ± 24                |                        | 41.7 ± 2.1              |
| Zinc (mg)           | 8.1 ± 0.1                | 0 ± 0                  |                         | 8.1 ± 0.2                 | 0.1 ± 0.1               |                          | 7.5 ± 0.1                | 0 ± 0                  |                         |

<sup>1</sup> PIR < 1.3 refers to income less than 1.3 times the poverty level; PIR 1.3 – 1.85 refers to income 1.3 to 1.85 times the poverty level; PIR > 1.85 refers to income greater than 1.85 times the poverty level.

<sup>2</sup> Values are means ± standard error for nutrients from food and beverage intake during two 24-h dietary recalls completed by parents.

<sup>3</sup> Determined via cut-point method using usual intakes as estimated using the National Cancer Institute method employing use of both dietary recalls compared to recommended intakes.

AI: Acceptable Intake; DFE: Dietary Folate Equivalent; EAR: Estimated Average Requirement; PIR: Poverty Income Ratio; RAE: Retinol Activity Equivalent

PIR < 1.3 refers to income less than 1.3 times the poverty level; PIR 1.3 – 1.85 refers to income 1.3 to 1.85 times the poverty level; PIR > 1.85 refers to income greater than 1.85 times the poverty level.

<sup>ab</sup> Percentages with different superscripts are significantly different using z-scores, p < 0.05



**TABLE S3d. Mean nutrient intake of children 4-6 years and proportion not meeting DRIs by Poverty Income Ratio**

| Nutrient            | PIR < 1.3 <sup>1</sup>   |                         |                          | PIR 1.3-1.85 <sup>1</sup> |                        |                          | PIR ≥ 1.85 <sup>1</sup>  |                        |                          |
|---------------------|--------------------------|-------------------------|--------------------------|---------------------------|------------------------|--------------------------|--------------------------|------------------------|--------------------------|
|                     | Mean ± S.E. <sup>2</sup> | % < EAR <sup>3</sup>    | % > AI <sup>3</sup>      | Mean ± S.E. <sup>2</sup>  | % < EAR <sup>3</sup>   | % > AI <sup>3</sup>      | Mean ± S.E. <sup>2</sup> | % < EAR <sup>3</sup>   | % > AI <sup>3</sup>      |
| Dietary Fiber (g)   | 12.4 ± 0.2               |                         | 0.3 ± 0.1                | 11.8 ± 0.3                |                        | 0.3 ± 0.2                | 12 ± 0.2                 |                        | 0.1 ± 0.1                |
| Vitamin A, RAE (µg) | 565.1 ± 11.3             | 2.8 ± 0.7               |                          | 569.2 ± 23.5              | 1.1 ± 0.9              |                          | 587.1 ± 13.5             | 1.5 ± 0.5              |                          |
| Thiamin (mg)        | 1.4 ± 0                  | 0 ± 0                   |                          | 1.4 ± 0                   | 0.0 ± 0.1              |                          | 1.4 ± 0                  | 0 ± 0                  |                          |
| Riboflavin (mg)     | 2 ± 0                    | 0 ± 0                   |                          | 1.9 ± 0.1                 | 0 ± 0                  |                          | 1.9 ± 0                  | 0 ± 0                  |                          |
| Niacin (mg)         | 18.4 ± 0.2               | 0 ± 0                   |                          | 17.7 ± 0.5                | 0.0 ± 0.1              |                          | 17.3 ± 0.3               | 0 ± 0                  |                          |
| Vitamin B6 (mg)     | 1.6 ± 0                  | 0 ± 0                   |                          | 1.6 ± 0.1                 | 0.1 ± 0.1              |                          | 1.4 ± 0                  | 0 ± 0                  |                          |
| Folate DFE (µg)     | 497.5 ± 9.4              | 0.1 ± 0.1               |                          | 480.2 ± 18.9              | 0.1 ± 0.1              |                          | 472.6 ± 9.9              | 0 ± 0                  |                          |
| Vitamin B12 (µg)    | 4.8 ± 0.1                | 0 ± 0                   |                          | 4.6 ± 0.1                 | 0 ± 0                  |                          | 4.2 ± 0.1                | 0.1 ± 0.0              |                          |
| Vitamin C (mg)      | 88.2 ± 2.4               | 1.7 ± 0.4               |                          | 78 ± 4.3                  | 2.4 ± 1.1              |                          | 78.5 ± 2.8               | 2.3 ± 0.6              |                          |
| Vitamin D (µg)      | 6.4 ± 0.2                | 88.8 ± 1.3              |                          | 6.2 ± 0.2                 | 89.8 ± 2.2             |                          | 5.7 ± 0.2                | 91.8 ± 1.2             |                          |
| Vitamin E (mg)      | 5.4 ± 0.1                | 65.1 ± 2.2              |                          | 5.2 ± 0.2                 | 71.3 ± 3.7             |                          | 5.4 ± 0.1                | 68.5 ± 1.9             |                          |
| Calcium (mg)        | 966.5 ± 19.9             | 31.9 ± 2.1              |                          | 960.1 ± 34.8              | 30.9 ± 3.9             |                          | 967.2 ± 18.2             | 28.5 ± 1.8             |                          |
| Iron (mg)           | 13.5 ± 0.2               | 1.1 ± 0.2               |                          | 12.4 ± 0.3                | 1.6 ± 0.4              |                          | 12.4 ± 0.2               | 1.3 ± 0.2              |                          |
| Magnesium (mg)      | 210.1 ± 3                | 1.2 ± 0.3 <sup>ab</sup> |                          | 204.5 ± 4.4               | 1.7 ± 0.5 <sup>a</sup> |                          | 206.5 ± 2.8              | 0.5 ± 0.2 <sup>b</sup> |                          |
| Phosphorus (mg)     | 1146 ± 18                | 0 ± 0                   |                          | 1121 ± 30                 | 0.1 ± 0.1              |                          | 1125 ± 16                | 0 ± 0                  |                          |
| Choline (mg)        | 228.1 ± 4.5              |                         | 34.3 ± 2.4 <sup>a</sup>  | 217.2 ± 6.9               |                        | 27.2 ± 4.3 <sup>ab</sup> | 210.8 ± 4.7              |                        | 22.5 ± 2.9 <sup>b</sup>  |
| Sodium (mg)         | 2689 ± 37                |                         | 99.9 ± 0.0 <sup>ab</sup> | 2515 ± 65                 |                        | 99.8 ± 0.1 <sup>a</sup>  | 2554 ± 33                |                        | 100.0 ± 0.0 <sup>b</sup> |
| Potassium (mg)      | 2117 ± 32                |                         | 34.7 ± 1.9 <sup>a</sup>  | 2043 ± 59                 |                        | 31.0 ± 3.6 <sup>ab</sup> | 2001 ± 30                |                        | 25.7 ± 2.0 <sup>b</sup>  |
| Zinc (mg)           | 9.6 ± 0.1                | 0.2 ± 0.1               |                          | 9.1 ± 0.3                 | 0.7 ± 0.4              |                          | 8.8 ± 0.2                | 0.2 ± 0.1              |                          |

<sup>1</sup> PIR < 1.3 refers to income less than 1.3 times the poverty level; PIR 1.3 – 1.85 refers to income 1.3 to 1.85 times the poverty level; PIR > 1.85 refers to income greater than 1.85 times the poverty level.

<sup>2</sup> Values are means ± standard error for nutrients from food and beverage intake during two 24-h dietary recalls completed by parents.

<sup>3</sup> Determined via cut-point method using usual intakes as estimated using the National Cancer Institute method employing use of both dietary recalls compared to recommended intakes.

AI: Acceptable Intake; DFE: Dietary Folate Equivalent; EAR: Estimated Average Requirement; PIR: Poverty Income Ratio; RAE: Retinol Activity Equivalent

PIR < 1.3 refers to income less than 1.3 times the poverty level; PIR 1.3 – 1.85 refers to income 1.3 to 1.85 times the poverty level; PIR > 1.85 refers to income greater than 1.85 times the poverty level.

<sup>ab</sup> Percentages with different superscripts are significantly different using z-scores, p < 0.05

**Table 4S. Logistic Regression of meeting Serum Ferritin, Hemoglobin and Vitamin B6 cutoffs in Children 1-6 Years**

| Biomarker                                     | NHANES    | N     | Events | Variable           | OR    | LCL99-UCL99 | P                |
|-----------------------------------------------|-----------|-------|--------|--------------------|-------|-------------|------------------|
| Ferritin < 12 mg/dL                           | 2011-2016 | 544   | 20     | Male               | 1.15  | 0.46-2.88   | 0.686            |
|                                               |           |       |        | Hispanic           | 5.54  | 0.91-33.57  | <b>0.015</b>     |
|                                               |           |       |        | Non-Hispanic Black | 0.58  | 0.02-16.98  | 0.676            |
|                                               |           |       |        | Asian              | 13.58 | 0.53-348.15 | <b>0.038</b>     |
|                                               |           |       |        | Other              | 0.00  | 0.00-0.00   | <b>&lt;0.001</b> |
|                                               |           |       |        | WIC Eligible = Yes | 0.52  | 0.17-1.62   | 0.136            |
|                                               |           |       |        | WIC Benefits = Yes | 2.63  | 0.92-7.51   | <b>0.018</b>     |
|                                               | 2001-2016 | 3,942 | 332    | Male               | 1.37  | 0.89-2.10   | 0.058            |
|                                               |           |       |        | Mexican American   | 1.03  | 0.66-1.60   | 0.876            |
|                                               |           |       |        | Other Hispanic     | 0.82  | 0.42-1.62   | 0.460            |
|                                               |           |       |        | Non-Hispanic Black | 0.48  | 0.25-0.90   | <b>0.003</b>     |
|                                               |           |       |        | Other              | 0.73  | 0.27-1.96   | 0.414            |
|                                               |           |       |        | WIC Eligible = Yes | 0.84  | 0.52-1.35   | 0.334            |
|                                               |           |       |        | WIC Benefits = Yes | 1.52  | 0.94-2.47   | <b>0.025</b>     |
| Hemoglobin < 11 mg/dL                         | 2001-2016 | 6,802 | 215    | Male               | 1.07  | 0.67-1.71   | 0.713            |
|                                               |           |       |        | Mexican American   | 1.32  | 0.66-2.63   | 0.304            |
|                                               |           |       |        | Other Hispanic     | 1.50  | 0.63-3.59   | 0.229            |
|                                               |           |       |        | Non-Hispanic Black | 3.28  | 1.74-6.21   | <b>&lt;0.001</b> |
|                                               |           |       |        | Other              | 1.06  | 0.31-3.58   | 0.899            |
|                                               |           |       |        | WIC Eligible = Yes | 1.03  | 0.59-1.78   | 0.905            |
|                                               |           |       |        | WIC Benefits = Yes | 1.41  | 0.82-2.41   | 0.099            |
| Vitamin B6: Pyridoxal-5-phosphate < 20 nmol/L | 2001-2016 | 3,177 | 208    | Male               | 1.12  | 0.64-1.97   | 0.592            |
|                                               |           |       |        | Mexican American   | 0.62  | 0.16-2.46   | 0.373            |
|                                               |           |       |        | Other Hispanic     | 0.48  | 0.09-2.55   | 0.261            |
|                                               |           |       |        | Non-Hispanic Black | 0.75  | 0.29-1.93   | 0.441            |
|                                               |           |       |        | Other              | 0.61  | 0.16-2.34   | 0.347            |
|                                               |           |       |        | WIC Eligible = Yes | 1.96  | 0.89-4.33   | <b>0.029</b>     |
|                                               |           |       |        | WIC Benefits = Yes | 1.00  | 0.58-1.73   | 0.981            |

OR: odds ratio; LCL: lower confidence limit; UCL: upper confidence limit; WIC: Special Supplemental Nutrition Program for Women, Infants, and Children
